# Supplementary material
Source: HighWire-hosted journal article supplement (https://gut.bmj.com/content/66/2/362)

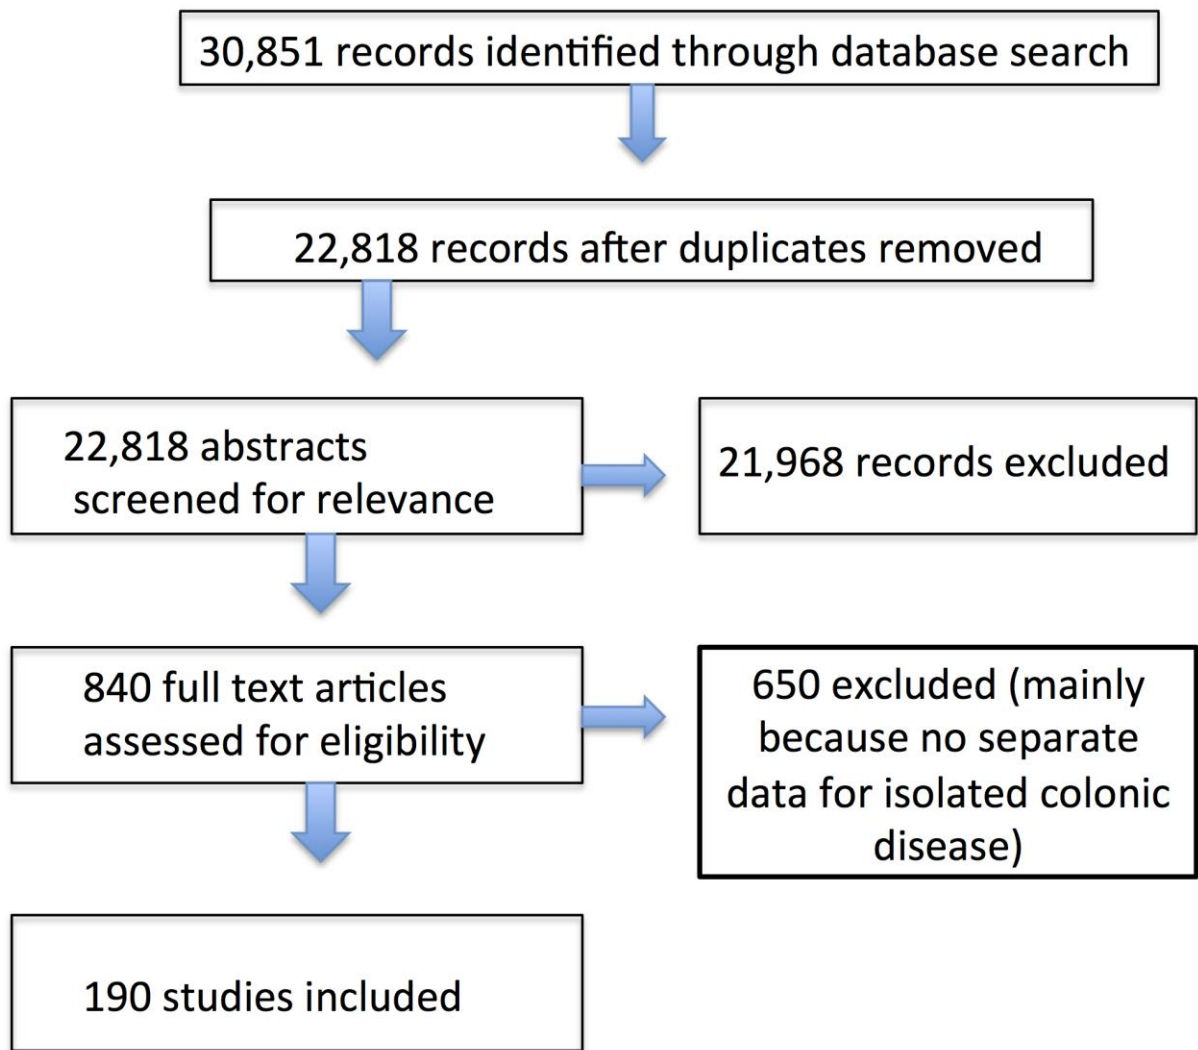

Supplement figure 1

Supplement: inline-supplementary-material-1 [file inline-supplementary-material-1.pdf]
